# Supplementary material
Source: PubMed Central journal article supplement (PMC5568031)
Supplement: NIHMS870694-supplement-SI.pdf [file NIHMS870694-supplement-SI.pdf]

## Supplementary Material:

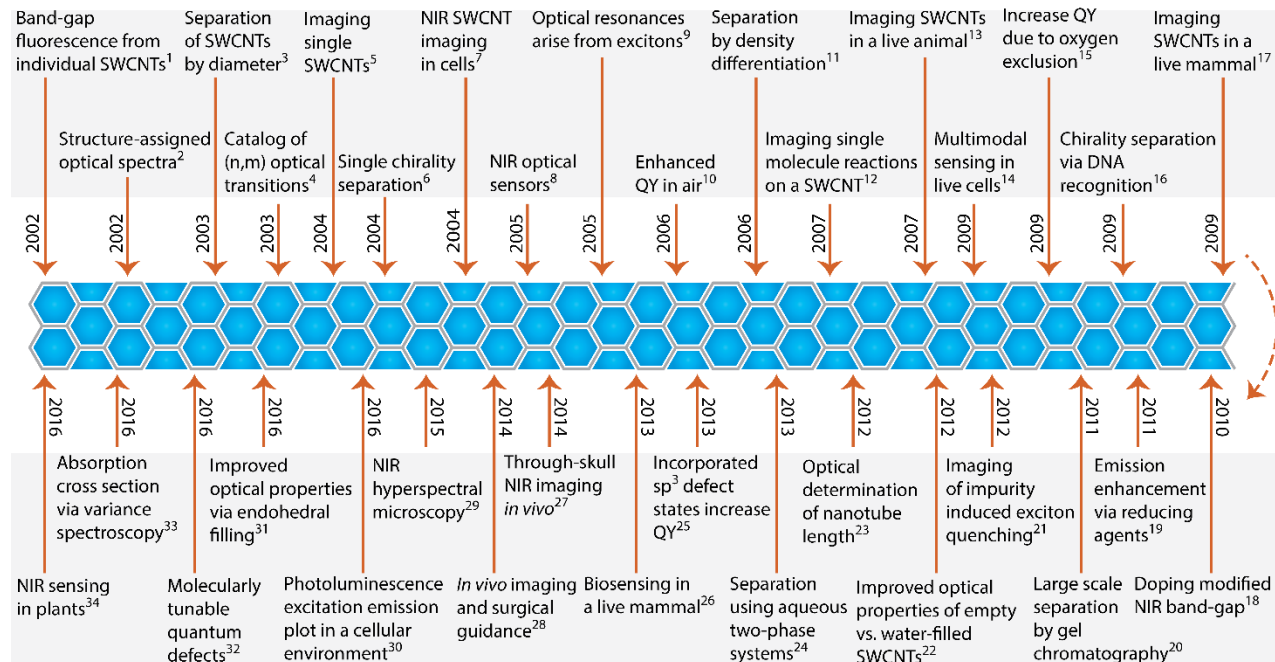

**Supplementary Figure 1.** A timeline of advancements in the measurement, processing, separation, modification, and application of photoluminescent single-walled carbon nanotubes. References are listed below:

1. O'Connell, M. J. et al. Band gap fluorescence from individual single-walled carbon nanotubes. *Science* 297, 593-596 (2002).
2. Bachilo, S. M. et al. Structure-assigned optical spectra of single-walled carbon nanotubes. *Science* 298, 2361-2366 (2002).
3. Krupke, R., Hennrich, F., von Lohneysen, H. & Kappes, M. M. Separation of metallic from semiconducting single-walled carbon nanotubes. *Science* 301, 344-347 (2003).
4. Weisman, R. B. & Bachilo, S. M. Dependence of optical transition energies on structure for single-walled carbon nanotubes in aqueous suspension: An empirical Kataura plot. *Nano Letters* 3, 1235-1238 (2003).
5. Lefebvre, J., Fraser, J. M., Finnie, P. & Homma, Y. Photoluminescence from an individual single-walled carbon nanotube. *Phys Rev B* 69 (2004).
6. Heller, D. A. et al. Concomitant length and diameter separation of single-walled carbon nanotubes. *J Am Chem Soc* 126, 14567-14573 (2004).
7. Cherukuri, P., Bachilo, S. M., Litovsky, S. H. & Weisman, R. B. Near-infrared fluorescence microscopy of single-walled carbon nanotubes in phagocytic cells. *J Am Chem Soc* 126, 15638-15639 (2004).
8. Barone, P. W., Baik, S., Heller, D. A. & Strano, M. S. Near-infrared optical sensors based on single-walled carbon nanotubes. *Nature Materials* 4, 86-92 (2005).
9. Wang, F., Dukovic, G., Brus, L. E. & Heinz, T. F. The optical resonances in carbon nanotubes arise from excitons. *Science* 308, 838-841 (2005).
10. Lefebvre, J., Austing, D. G., Bond, J. & Finnie, P. Photoluminescence imaging of suspended single-walled carbon nanotubes. *Nano Letters* 6, 1603-1608 (2006).
11. Arnold, M. S., Green, A. A., Hulvat, J. F., Stupp, S. I. & Hersam, M. C. Sorting carbon nanotubes by electronic structure using density differentiation. *Nature Nanotechnology* 1, 60-65 (2006).
12. Cagnet, L. et al. Stepwise quenching of exciton fluorescence in carbon nanotubes by single-molecule reactions. *Science* 316, 1465-1468 (2007).
13. Leeuw, T. K. et al. Single-walled carbon nanotubes in the intact organism: Near-ir imaging and biocompatibility studies in drosophila. *Nano Letters* 7, 2650-2654 (2007).
14. Heller, D. A. et al. Multimodal optical sensing and analyte specificity using single-walled carbon nanotubes. *Nature Nanotechnology* 4, 114-120 (2009).
15. Ju, S. Y., Kopcha, W. P. & Papadimitrakopoulos, F. Brightly fluorescent single-walled carbon nanotubes via an oxygen-excluding surfactant organization. *Science* 323, 1319-1323 (2009).
16. Tu, X., Manohar, S., Jagota, A. & Zheng, M. DNA sequence motifs for structure-specific recognition and separation of carbon nanotubes. *Nature* 460, 250-253 (2009).
17. Welscher, K. et al. A route to brightly fluorescent carbon nanotubes for near-infrared imaging in mice. *Nature Nanotechnology* 4, 773-780 (2009).
18. Ghosh, S., Bachilo, S. M., Simonette, R. A., Beckingham, K. M. & Weisman, R. B. Oxygen doping modifies near-infrared band gaps in fluorescent single-walled carbon nanotubes. *Science* 330, 1656-1659 (2010).
19. Lee, A. J. et al. Bright fluorescence from individual single-walled carbon nanotubes. *Nano Letters* 11, 1636-1640 (2011).
20. Liu, H., Nishide, D., Tanaka, T. & Kataura, H. Large-scale single-chirality separation of single-wall carbon nanotubes by simple gel chromatography. *Nature Communications* 2 (2011).
21. Crochet, J. J., Duque, J. G., Werner, J. H. & Doorn, S. K. Photoluminescence imaging of electronic-impurity-induced exciton quenching in single-walled carbon nanotubes. *Nature Nanotechnology* 7, 126-132 (2012).
22. Cambre, S. et al. Luminescence properties of individual empty and water-filled single-walled carbon nanotubes. *ACS Nano* 6, 2649-2655 (2012).
23. Streit, J. K. et al. Measuring single-walled carbon nanotube length distributions from diffusional trajectories. *ACS Nano* 6, 8424-8431 (2012).
24. Khripin, C. Y., Fagan, J. A. & Zheng, M. Spontaneous partition of carbon nanotubes in polymer-modified aqueous phases. *J Am Chem Soc* 135, 6822-6825 (2013).
25. Piao, Y. et al. Brightening of carbon nanotube photoluminescence through the incorporation of sp<sup>3</sup> defects. *Nature Chemistry* 5, 840-845 (2013).
26. Iverson, N. M. et al. In vivo biosensing via tissue-localizable near-infrared-fluorescent single-walled carbon nanotubes. *Nature Nanotechnology* 8, 873-880 (2013).
27. Hong, G. et al. Through-skull fluorescence imaging of the brain in a new near-infrared window. *Nature Photonics* 8, 723-730 (2014).
28. Ghosh, D. et al. Deep, noninvasive imaging and surgical guidance of submillimeter tumors using targeted m13-stabilized single-walled carbon nanotubes. *Proceedings of the National Academy of Sciences of the United States of America* 111, 13948-13953 (2014).
29. Roxbury, D. et al. Hyperspectral microscopy of near-infrared fluorescence enables 17-chirality carbon nanotube imaging. *Sci Rep-Uk* 5 (2015).
30. Roxbury, D., Jena, P. V., Shamay, Y., Horoszko, C. P. & Heller, D. A. Cell membrane proteins modulate the carbon nanotube optical bandgap via surface charge accumulation. *ACS Nano* 10, 499-506 (2016).
31. Campo, J. et al. Enhancing single-wall carbon nanotube properties through controlled endohedral filling. *Nanoscale Horiz* 1, 317-324 (2016).
32. Kwon, H. et al. Molecularly tunable fluorescent quantum defects. *J Am Chem Soc* 138, 6878-6885 (2016).
33. Sanchez, S. R., Bachilo, S. M., Kadria-Vili, Y., Lin, C. W. & Weisman, R. B. (n,m)-specific absorption cross sections of single-walled carbon nanotubes measured by variance spectroscopy. *Nano Letters* 16, 6903-6909 (2016).
34. Wong, M. H. et al. Nitroaromatic detection and infrared communication from wild-type plants using plant nanobionics. *Nature Materials* (2016).
